# Supplementary material for: Read-across-based intelligent learning: development of a global q-RASAR model for the efficient quantitative predictions of skin sensitization potential of diverse organic chemicals
Source: Royal Society of Chemistry journal article supplement (doi:10.1039/d3em00322a), 2023-01-01
Supplement: d3em00322a1.xlsx [file d3em00322a1.xlsx]

## Sheet: Sheet1
																Read-across-based intelligent learning: Development of a global q-RASAR model for the efficient quantitative predictions of skin sensitization potential of diverse organic chemicals
																Arkaprava Banerjee, Kunal Roy
																Drug Theoretics and Cheminformatics Laboratory, Department of Pharmaceutical Technology, Jadavpur University, Kolkata 700032, India
														Supplementary Information SI-1

## Sheet: Data
No.	Name	SMILES	pEC3 (LLNA)
1	Cyclooctanol	OC1CCCCCCC1	0
2	Ethyl benzoylacetate	CCOC(=O)CC(=O)c1ccccc1	0
3	3-Hydroxy-2-nitropyridine	OC1=CC=CN=C1[N+]([O-])=O	0
4	Methyl dihydrojasmonate	CCCCCC1C(CCC1=O)CC(=O)OC	0
5	2-Butoxyethyl acetate	CCCCOCCOC(C)=O	0
6	Dihydromyrcenol	CC(CCCC(C)(C)O)C=C	0
7	Succinic acid	OC(CCC(O)=O)=O	0
8	Geranyl nitrile	C/C(CCC=C(C)C)=C\C#N	0
9	Octanenitrile	CCCCCCCC#N	0
10	Phenylethyl alcohol	OCCC1=CC=CC=C1	0
11	Benzyl alcohol	OCc1ccccc1	0
12	Isocyclogeraniol	CC1C(CO)C(C)C=C(C)C1	0
13	2-Hydroxypropyl methacrylate	C=C(C)C(=O)OCC(C)O	0
14	4-Hydroxybenzaldehyde	O=CC(C=C1)=CC=C1O	0
15	Methyl 3-bromopropionate	COC(CCBr)=O	0
16	Linalool alcohol	CC(C=C)(O)CCC(O)C(C)=C	0
17	Ethyl 4-amino-benzoate	O=C(OCC)C1=CC=C(N)C=C1	0
18	Z-1-(1-Methoxypropoxy)hex-3-ene	CCC(OC)OCC/C=C\CC	0
19	Benzaldehyde	O=Cc1ccccc1	0
20	Vanillin	COc1cc(C=O)ccc1O	0
21	3,7-dimethylocta-1,6-dien-3-yl dimethylcarbamate	CC(C)=CCCC(C)(OC(N(C)C)=O)C=C	0
22	N-p-benzonitrile menthanecarboxamide	C[C@H]1C[C@@H](C(NC2=CC=C(C#N)C=C2)=O)[C@H](C(C)C)CC1	0
23	Coumarin	O=C1OC2=CC=CC=C2C=C1	0
24	2,6-Dimethoxyphenol	OC(C(OC)=CC=C1)=C1OC	0
25	p-Methoxybenzaldehyde	O=CC(C=C1)=CC=C1OC	0
26	2-Methoxyethyl acetate	O=C(C)OCCOC	0
27	Isoeugenyl acetate	O=C(C)OC(C=C1)=C(OC)C=C1/C=C/C	0
28	Methyl anthranilate	O=C(OC)C(C=CC=C1)=C1N	0
29	3-Methyl-1-butanol	OCCC(C)C	0
30	Nonanoic acid	O=C(CCCCCCCC)O	0
31	1-Octen-3-yl acetate	O=C(C)OC(CCCCC)C=C	0
32	Phenoxyacetic acid	O=C(O)COC1=CC=CC=C1	0
33	3-Phenylpropyl acetate	O=C(C)OCCCC1=CC=CC=C1	0
34	Sclareol	C=CC(O)(C)CCC(C(O)(C)CC1)C(CCC2)(C)C1C2(C)C	0
35	2-Undecanol	OC(C)CCCCCCCCC	0
36	N,N-Dimethylformamide	O=CN(C)C	0
37	Isobornyl acetate	CC(=O)O[C@H]1C[C@H]2CC[C@@]1(C)C2(C)C	0
38	4-​Methyl-​2-​nitroanisole	COc1ccc(C)cc1[N+](=O)[O-]	0
39	Furil	O=C(C(=O)c1occc1)c2occc2	0
40	Cinnamyl nitrile	N#C/C=C/C1=CC=CC=C1	0
41	α-Isobutylphenethyl alcohol	OC(CC(C)C)CC1=CC=CC=C1	0
42	Hexane	CCCCCC	0
43	Ethyl vanillin	CCOC=1C=C(C=CC=1O)C=O	0
44	Benzoic acid	OC(=O)c1ccccc1	0
45	Glycerol	OCC(O)CO	0
46	Phenol	OC1=CC=CC=C1	0
47	Sodium dodecyl sulfate	[Na+].CCCCCCCCCCCCOS([O-])(=O)=O	0
48	4-Hydroxybenzoic acid	C=1C=C(C=CC=1C(O)=O)O	0
49	Diethylene glycol	OCCOCCO	0
50	1-Butanol	CCCCO	0
51	Fumaric acid	OC(=O)C=CC(O)=O	0
52	Lactic acid	CC(O)C(O)=O	0
53	Salicylic acid	OC(=O)c1ccccc1O	0
54	Chlorobenzene	Clc1ccccc1	0
55	Tartaric acid	OC(C(O)C(O)=O)C(O)=O	0
56	Sulphanilamide	C=1C=C(C=CC=1N)S(N)(=O)=O	0
57	1-Bromobutane	CCCCBr	0
58	4-Aminobenzoic acid	O=C(O)C1=CC=C(N)C=C1	0
59	Saccharin	C1=CC=C2C(=C1)C(=NS2(=O)=O)O	0
60	p-Nitro-benzaldehyde	O=CC1=CC=C([N+]([O-])=O)C=C1	0
61	Sulphanilic acid	Nc1ccc(cc1)S(O)(=O)=O	0
62	Xylene	CC1=CC=CC=C1C	0
63	Carbobenzyloxy-L-glutamine	NC(CC[C@H](NC(OCC1=CC=CC=C1)=O)C(O)=O)=O	0
64	4-Methoxyacetophenone	CC(C1=CC=C(C=C1)OC)=O	0
65	Octanoic acid	CCCCCCCC(O)=O	0
66	Diethyl phthalate	CCOC(=O)c1ccccc1C(=O)OCC	0
67	Ethylene brassylate	O=C1CCCCCCCCCCCC(=O)OCCO1	0
68	Isopropanol	CC(C)O	0
69	Majantol	OCC(C)(C)CC1=CC(C)=CC=C1	0
70	Methyl salicylate	O=C(OC)C(C=CC=C1)=C1O	0
71	Phenoxyethyl isobutyrate	O=C(OCCOC1=CC=CC=C1)C(C)C	0
72	Propylene glycol	CC(O)CO	0
73	N,N-Diethyl-3-methylbenzamide	CCN(CC)C(=O)c1cccc(C)c1	0
74	6-Methyl coumarin	Cc2ccc1OC(=O)C=Cc1c2	0
75	Methylparaben	COC(C1=CC=C(C=C1)O)=O	0
76	Propylparaben	CCCOC(=O)c1ccc(O)cc1	0
77	2-Acetyl-cyclohexanone	CC(=O)C1CCCCC1=O	0
78	2-Hydroxybenzothiaziole	O=C1NC2=CC=CC=C2S1	0
79	Benzalkonium chloride	C[N+](CCCCCCCCCCCCCCCCCC)(C)CC1=CC=CC=C1.[Cl-]	0
80	Dimethyl isophthalate	O=C(OC)C1=CC(C(OC)=O)=CC=C1	0
81	Sodium 1-nonanesulfonate	CCCCCCCCCS(=O)([O-])=O.[Na+]	0
82	Streptomycin sulfate	O=S(O)(O)=O.N=C(N)N[C@H]1[C@H](O)[C@@H](O)[C@@H]([C@@H](NC(N)=N)[C@@H]1O)O[C@@H](O2)[C@@H](O[C@@H](O[C@H](CO)[C@H]3O)[C@H](NC)[C@H]3O)[C@@](C=O)(O)[C@H]2C	0
83	1-Iodohexane	CCCCCCI	0
84	Clofibrate	CCOC(=O)C(C)(C)Oc1ccc(Cl)cc1	0
85	Vinylidene dichloride	C=C(Cl)Cl	0
86	4-Carboxyphenylacetate	OC(C1=CC=C(OC(C)=O)C=C1)=O	0
87	2-Chloro-6-nitrotoluene	CC1=C([N+]([O-])=O)C=CC=C1Cl	0
88	2,6-Dimethylbenzoic acid	CC1=CC=CC(C)=C1C(O)=O	0
89	2-Fluoro-5-nitroaniline	Nc1cc(ccc1F)[N+](=O)[O-]	0
90	2-Hydroxy-2-methylsuccinic acid	O[C@@](C(O)=O)(C)CC(O)=O	0
91	3-Hydroxy-4-nitrobenzoic acid	O=C(C(C=C1O)=CC=C1[N+]([O-])=O)O	0
92	3-Phenoxypropionitrile	C1=CC=C(C=C1)OCCC#N	0
93	3-Chloro-4-methoxybenzaldehyde	COC=1C=CC(=CC=1Cl)C=O	0
94	3-​Cyclopentyl-​1-​propanol	OCCCC1CCCC1	0
95	2-Mercaptobenzoxazole	SC1=NC2=C(O1)C=CC=C2	0
96	Neomycin sulphate	N[C@@H]1[C@@H](O[C@H]([C@H](N)[C@H]2O)O[C@H](CN)[C@H]2O)[C@@H]([C@@H](O)[C@@H](C1)N)O[C@H](O[C@@H]3CO)[C@H](O)[C@@H]3OC([C@H](N)[C@H]4O)O[C@@H](CN)[C@H]4O.OS(O)(=O)=O	0
97	Hydrocortisone	O=C1CC[C@@]2(C)C(CC[C@]3([H])[C@]2([H])[C@@H](O)C[C@@]4(C)[C@@]3([H])CC[C@@]4(C(CO)=O)O)=C1	0
98	6-Methoxynaphthalene-2-carbaldehyde	O=CC1=CC2=CC=C(OC)C=C2C=C1	0
99	Kanamycin	NCC3OC(OC2C(N)CC(N)C(OC1OC(CO)C(O)C(N)C1O)C2O)C(O)C(O)C3O	0
100	Eugenyl acetate	CC(=O)Oc1ccc(CC=C)cc1OC	0
101	Dibutyl-phtalate	CCCCOC(C1=CC=CC=C1C(=O)OCCCC)=O	0
102	Dimethyl sulfone	CS(C)(=O)=O	0
103	α-Amylcinnamic alcohol	CCCCCC(CO)=Cc1ccccc1	0
104	Butylbenzylphthalate	CCCCOC(C1=CC=CC=C1C(=O)OCC2=CC=CC=C2)=O	0
105	Pentaerythritol triacrylate	C=CC(=O)OCC(CO)(COC(=O)C=C)COC(=O)C=C	0
106	Aniline	Nc1ccccc1	0.0196996
107	Pyridine	c1ccncc1	0.040844
108	Methyl methacrylate	COC(=O)C(C)=C	0.0462783
109	2-Ethylbutyraldehyde	CCC(CC)C=O	0.16691
110	Limonene	CC(=C)[C@@H]1CCC(=CC1)C	0.49082
111	Hexyl 2-methylbutanoate	O=C(C(C)CC)OCCCCCC	0.531409
112	Ethyl acrylate	CCOC(=O)C=C	0.553363
113	Linalool	CC(C)=CCCC(C)(O)C=C	0.554757
114	Citronellol	C[C@@H](CCO)CCC=C(C)C	0.555386
115	2-(tert-butyl)-5-methyl-2-propyl-2,5-dihydrofuran	CC(C)(C)C1(CCC)C=CC(C)O1	0.578943
116	Methyl acrylate	C=CC(=O)OC	0.633923
117	Butylglycidylether	CCCCOCC1CO1	0.667386
118	5-Methyl-2,3-hexanedione	CC(C)CC(=O)C(C)=O	0.696167
119	Phenethyl isovalerate	CC(C)CC(=O)OCCc1ccccc1	0.71786
120	Oxalic acid anhydrous	C(C(O)=O)(O)=O	0.778296
121	Piperonal	O=Cc1ccc2c(c1)OCO2	0.778527
122	cis-6-Nonenal	CCC(=C(CCCCC=O)[H])[H]	0.783198
123	Isopropyl myristate	CCCCCCCCCCCCCC(=O)OC(C)C	0.788634
124	Cinnamic alcohol	OCC=Cc1ccccc1	0.805468
125	Geraniol	CC(C)=CCCC(C)=CCO	0.805848
126	Butyl acrylate	CCCCOC(C=C)=O	0.806756
127	2,6-Dimethylhept-5-enal	CC(CCC=C(C)C)C=O	0.824591
128	2,2,6,6-Tetramethyl-3,5-heptanedione	CC(C)(C)C(CC(C(C)(C)C)=O)=O	0.834114
129	2-((3,7-Dimethyloct-6-en-1-yl)oxy)acetaldehyde	CC(CCC=C(C)C)CCOCC=O	0.845536
130	Ethylene glycol dimethacrylate	CC(=C)C(=O)OCCOC(=O)C(C)=C	0.849989
131	6-Methoxy-2,6-dimethyl-heptanal	CC(CCCC(C)(C)OC)C=O	0.855973
132	Estragole	C=CCC1=CC=C(C=C1)OC	0.865497
133	Hydroxycitronellal	CC(CCCC(C)(C)O)CC=O	0.874457
134	Butane-2,3-dione	CC(C(C)=O)=O	0.881874
135	Linalyl acetate	CC(C)=CCCC(C)(C=C)OC(C)=O	0.894958
136	Myraldene	CC(C)=CCCC1CCC(C=O)CC=1	0.903768
137	Cyclamen aldehyde	CC(C)C1=CC=C(C=C1)CC(C)C=O	0.931088
138	(E)-2-((But-2-enyloxy)methyl)oxirane	C/C=C/COCC1CO1	0.961658
139	1-(2,3,8,8-Tetramethyl-1,2,3,4,5,6,7,8-octahydronaphthalen-2-yl)ethanone	CC1CC2=C(CC1(C)C(C)=O)C(C)(C)CCC2	0.969555
140	3-​Methyl-α-​ionone	CC(=O)C(C)=CC1C(=CCCC1(C)C)C	0.976085
141	2,4-Dichloronitrobenzene	[O-][N+](C1=CC=C(Cl)C=C1Cl)=O	0.982271
142	N,N-Dibutylaniline	CCCCN(CCCC)C1=CC=CC=C1	1.02022
143	Lillial	CC(Cc1ccc(cc1)C(C)(C)C)C=O	1.03845
144	Penicillin G	CC3(C)S[C@@H]2[C@H](NC(=O)Cc1ccccc1)C(=O)N2[C@H]3C(O)=O	1.04713
145	Bisphenol A glycerolate dimethacrylate	C=C(C)C(=O)OCC(COC1=CC=C(C=C1)C(C)(C)C2=CC=C(C=C2)OCC(COC(C(=C)C)=O)O)O	1.05656
146	Phenyl benzoate	O=C(Oc1ccccc1)c2ccccc2	1.06415
147	α-Methyl-1,3-benzodioxole-5-propionaldehyde	CC(Cc2ccc1OCOc1c2)C=O	1.06893
148	Lyral	CC(C)(O)CCCC1=CCC(C=O)CC1	1.08986
149	Benzyl benzoate	O=C(OCc1ccccc1)c2ccccc2	1.09638
150	2-Acetyl-1,3,3,4,4-pentamethylcyclopentene	CC1CC(C)(C)C(C)(C)C=1C(C)=O	1.09761
151	Eugenol	COc1cc(CC=C)ccc1O	1.10478
152	L-Carvone	CC(=C)[C@@H]1CC=C(C)C(=O)C1	1.10485
153	Benzyl cinnamate	O=C(OCc1ccccc1)C=Cc2ccccc2	1.11227
154	Pentachlorophenol	Oc1c(Cl)c(Cl)c(Cl)c(Cl)c1Cl	1.12441
155	Methyl methanesulphonate	COS(C)(=O)=O	1.13342
156	1-Bromododecane	CCCCCCCCCCCCBr	1.14133
157	1-methyl-2-methylene-4-(prop-1-en-2-yl)-7-oxabicyclo[4.1.0]heptane	C=C(C1CC(C2(C)OC2C1)=C)C	1.20264
158	Imidazolidinyl urea	OCN2C(NC(=O)NCNC(=O)NC1N(CO)C(=O)NC1=O)C(=O)NC2=O	1.20894
159	1-Bromohexane	CCCCCCBr	1.21767
160	Maleic acid	O=C(O)/C=C\C(O)=O	1.21962
161	Acetyl cedrene	CC1CCC2C11CC(C(C)=C(C(C)=O)C1)C2(C)C	1.24767
162	Methyl isoeugenol	COC1=C(OC)C=CC(/C=C/C)=C1	1.25098
163	trans-2-Hexenal	CCCC=CC=O	1.25148
164	α-Hexylcinnamaldehyde	CCCCCCC(C=O)=Cc1ccccc1	1.25592
165	α-Amylcinnamic aldehyde	CCCCCC(C=O)=Cc1ccccc1	1.26458
166	2-Ethylhexyl acrylate	CCCCC(CC)COC(C=C)=O	1.26548
167	2-Methylundecanal	CCCCCCCCCC(C)C=O	1.26557
168	Perilla aldehyde	CC(=C)C1CCC(=CC1)C=O	1.26824
169	Resorcinol	Oc1cccc(O)c1	1.26951
170	Farnesal	CC(C)=CCCC(C)=C(CCC(C)=C(C=O)[H])[H]	1.27493
171	Safranal	CC=1C=CCC(C)(C)C=1C=O	1.30167
172	1-(p-Methoxyphenyl)-1-penten-3-one	CCC(C(=C(C1=CC=C(C=C1)OC)[H])[H])=O	1.31082
173	5-Methyl-2-phenyl-2,4-dihydro-pyrazol-3-one	CC1CC(=O)N(c2ccccc2)N=1	1.31163
174	Isocyclocitral	CC1CC(C)=CC(C)C1C=O	1.31327
175	Abietic acid	CC(C)C3=CC2=CC[C@@H]1[C@](C)(CCC[C@@]1(C)C(O)=O)[C@H]2CC3	1.31334
176	Citral	CC(C)=CCCC(C)=CC=O	1.31918
177	Trimellitic anhydride	C1=CC2=C(C=C1C(=O)O)C(=O)OC2=O	1.31981
178	2-Phenylpropionaldehyde	CC(C=O)C1=CC=CC=C1	1.32835
179	Anisyl alcohol	COc1ccccc1CO	1.36953
180	Creosol	COc1cc(C)ccc1O	1.37695
181	Dihydroeugenol	CCCC=1C=CC(=C(C=1)OC)O	1.38817
182	3,4-Dihydrocoumarin	C1=CC=C2C(=C1)CCC(=O)O2	1.42254
183	Squaric acid	C1(=C(C(C1=O)=O)O)O	1.42366
184	Ethylenediamine	NCCN	1.43645
185	2,4-Heptadienal	CCC(=C(C(=C(C=O)[H])[H])[H])[H]	1.43992
186	Tropolone	C1=CC=C(C(C=C1)=O)O	1.45332
187	Dodecyl methanesulfonate	CS(=O)(OCCCCCCCCCCCC)=O	1.46805
188	(2-Bromoethyl)-benzene	BrCCc1ccccc1	1.47492
189	2-(Cyclohexyloxymethyl)oxirane	C1(OCC2CO2)CCCCC1	1.47773
190	Thioglycerol	OC(CS)CO	1.48384
191	Phenylacetaldehyde	O=CCc1ccccc1	1.49426
192	Diethylenetriamine	C(CNCCN)N	1.49768
193	α-Methylcinnamaldehyde	CC(C=O)=Cc1ccccc1	1.51171
194	2-(Hexadecycloxy) ethanol	CCCCCCCCCCCCCCCCOCCO	1.51263
195	3-Aminophenol	C1=CC(=CC(=C1)O)N	1.53279
196	n-Heptyl β-D-thioglucopyranoside	O[C@H]([C@@H](O)[C@@H]1O)[C@H](SCCCCCCC)O[C@@H]1CO	1.54963
197	5-Amino-2-methylphenol	CC=1C=CC(=CC=1O)N	1.55896
198	3,7-Dimethyl-2-methyleneoct-6-enal	CC(CCC=C(C)C)C(=C)C=O	1.56758
199	Benzylideneacetone	CC(C(=C(C1=CC=CC=C1)[H])[H])=O	1.59672
200	Farnesol	CC(C)=CCCC(C)=CCCC(C)=CCO	1.60671
201	Glyoxal	O=CC=O	1.6176
202	β-Damascone	CC1(C)C(C(/C=C/C)=O)=C(C)CCC1	1.62597
203	Cinnamic aldehyde	O=CC=Cc1ccccc1	1.62974
204	g-Damascone	CC(CCC1)(C)C(C(/C=C/C)=O)C1=C	1.63077
205	5-Methyl-2-phenyl-2-hexenal	CC(C)C/C=C(C1=CC=CC=C1)/C=O	1.63133
206	Formaldehyde	C=O	1.63246
207	4-(1,1-Dimethylethyl)-benzenepropanal	CC(C)(C)c1ccc(CCC=O)cc1	1.64592
208	Tetramethylthiuram disulfide	CN(C)C(=S)SSC(N(C)C)=S	1.66499
209	3-Dimethyl-amino-1-propylamine	CN(C)CCCN	1.66694
210	Diethyl sulfate	CCOS(=O)(=O)OCC	1.66951
211	3-Propylidenephthalide	CCC=C1OC(=O)c2ccccc12	1.67285
212	d-Damascone	CC1(C)C(C(/C=C/C)=O)C(C)C=CC1	1.73314
213	Octyl gallate	CCCCCCCCOC(=O)c1cc(O)c(O)c(O)c1	1.75179
214	α-Damascone	CC1(C)C(C(/C=C/C)=O)C(C)=CCC1	1.76547
215	Benzyl-glycidylether	C1(COCC2CO2)=CC=CC=C1	1.76822
216	Hexaethylene glycol monododecyl ether	OCCOCCOCCOCCOCCOCCOCCCCCCCCCCCC	1.78228
217	trans-2-Decenal	CCCCCCCC(=C(C=O)[H])[H]	1.79029
218	4-Ethenyl-1-cyclohexene-1-carboxaldehyde	O=CC1=CCC(C=C)CC1	1.79241
219	Allyl phenoxyacetate	C=CCOC(=O)COc1ccccc1	1.79241
220	2-Phenethyloxirane	C1(CCC2CO2)=CC=CC=C1	1.79588
221	Galbanone	CC1(C)CCCC(C(=O)CCC=C)C1	1.80457
222	4-Vinyl-pyridine	C=CC1=CC=NC=C1	1.81765
223	1,2-Benzisothiazolin-3-one	O=C1NSc2ccccc12	1.8178
224	Methyl 2-nonynoate	CCCCCCC#CC(=O)OC	1.82796
225	2,4-​Dimethyl-​3-​cyclohexenecarboxaldehyde	O=CC1C(C)C=C(C)CC1	1.84058
226	2-Hexylidene-Cyclopentanone	CCCCCC=C1CCCC1=O	1.84058
227	Methyl pyruvate	CC(C(=O)OC)=O	1.8501
228	3,4-Dinitrophenol	Oc1ccc(N(=O)=O)c(N(=O)=O)c1	1.8501
229	2-(2-Phenoxyethyl)oxirane	C1(OCCC2CO2)=CC=CC=C1	1.87295
230	2-Amino-5-methylphenol	Cc1ccc(N)c(O)c1	1.88631
231	Benzyl salicylate	Oc1ccccc1C(=O)OCc2ccccc2	1.89599
232	Diethyl maleate	CCOC(=O)C=CC(=O)OCC	1.91376
233	4-Amino-m-cresol	CC1=CC(=CC=C1N)O	1.91434
234	2-Hydroxy-ethyl-acrylate	OCCOC(=O)C=C	1.91878
235	2-Bromotetradecanoic acid	CCCCCCCCCCCCC(Br)C(O)=O	1.95604
236	Isoeugenol	COc1cc(C=CC)ccc1O	1.9601
237	2-Mercaptobenzothiazol	SC2=NC1=CC=CC=C1S2	1.99292
238	(2E)-5,6,7-Trimethyl-2,5-octadien-4-one	C/C(C(/C=C/C)=O)=C(C(C)C)\C	2.01667
239	N-Ethyl-N-nitrosourea	CCN(C(N)=O)N=O	2.0272
240	1-Naphtol	C1=CC=C2C(=C1)C=CC=C2O	2.04493
241	1-Phenyl-1,2-propanedione	CC(C(C1=CC=CC=C1)=O)=O	2.05679
242	2-(Phenethoxymethyl)oxirane	C1(CCOCC2CO2)=CC=CC=C1	2.07489
243	1,6-Hexandiol-diglycidyl ether	C(CCCCCOCC1CO1)OCC1CO1	2.08354
244	2,4-Dinitrobenzenesulfonic acid, sodium salt	[Na+].[O-][N+](=O)c1ccc(c(c1)[N+](=O)[O-])S(=O)(=O)[O-]	2.09372
245	Tetraethylene glycol monotetradecyl ether	OCCOCCOCCOCCOCCCCCCCCCCCCCC	2.14316
246	Damascenone	CC1(C)C(C(/C=C/C)=O)=C(C)C=CC1	2.19303
247	1-(Chloromethyl)-4-nitrobenzene	ClCC1=CC=C([N+]([O-])=O)C=C1	2.23447
248	4-Methyl-benzaldehyde	Cc1ccc(C=O)cc1	2.24087
249	1,2-Cyclohexane dicarboxylic anhydride	C1CCC2C(C1)C(=O)OC2=O	2.26369
250	Squaric acid diethyl ester	O=C1C(C(OCC)=C1OCC)=O	2.27661
251	Chlorpromazine hydrochloride	CN(C)CCCN2c1ccccc1Sc3ccc(Cl)cc23	2.32018
252	1,3-phenylenediamine	NC1=CC=CC(N)=C1	2.34379
253	Bisphenol A-diglycidyl ether	CC(C)(c2ccc(OCC1CO1)cc2)c4ccc(OCC3CO3)cc4	2.35591
254	2-Amino-phenol	Nc1ccccc1O	2.43588
255	Bisphenol F diglycidylether	C1(CC2=CC=C(OCC3CO3)C=C2)=CC=C(OCC4CO4)C=C1	2.4442
256	Metol	CNc1ccc(O)cc1.CNc2ccc(O)cc2.OS(O)(=O)=O	2.45275
257	2-(Phenylthiomethyl)oxirane	C1(SCC2CO2)=CC=CC=C1	2.45656
258	Diethylene glycol monohexadecyl ether	CCCCCCCCCCCCCCCCOCCOCCO	2.4574
259	2-​Methyl-​4-​isothiazolin-​3-​one	[H+].[Cl-].CN1SC=CC1=O	2.4592
260	Methyldibromo glutaronitrile	BrCC(Br)(CCC#N)C#N	2.47052
261	Decylphenolpolyethylene glycol ether	CCCCCCCCCC1=CC=C(OCCOCCOCCOCCOCCOCCOCCOCCOCCO)C=C1	2.49256
262	Iodopropynyl butylcarbamate	CCCCNC(=O)OCC#CI	2.4946
263	N,N-dimethyl-4-nitrosoaniline	CN(c1ccc(N=O)cc1)C	2.49537
264	Phenylglycidylether	C1(COC2=CC=CC=C2)OC1	2.51383
265	Methyl 2-octynoate	CCCCCC#CC(=O)OC	2.5349
266	2-Nitro-1,4-phenylendiamine	Nc1ccc(N)c(c1)[N+](=O)[O-]	2.58303
267	Dimethylfumarate	COC(=O)C=CC(=O)OC	2.61469
268	Dodecyl and tetradecyl glycidyl ethers	CCCCCCCCCCCCOCC1OC1.CCCCCCCCCCCCCCOCC2OC2	2.63009
269	4-(N-Ethyl-N-2-methan-sulphonamido-ethyl)-2-methyl-1,4-phenylenediamine	CCN(CCNS(C)(=O)=O)C1=CC=C(C(C)=C1)N.CCN(CCNS(C)(=O)=O)C2=CC=C(C(C)=C2)N.OS(O)(=O)=O.OS(O)(=O)=O.OS(O)(=O)=O	2.65543
270	2,5-Diaminotoluene sulphate	Cc1cc(N)ccc1N.OS(O)(=O)=O	2.74086
271	Chloramine T	CC1=CC=C(C=C1)S([N-]Cl)(=O)=O.[Na+]	2.75519
272	Benzoyl chloride	O=C(Cl)c1ccccc1	2.78616
273	Maleic anhydride	C1=CC(=O)OC1=O	2.78737
274	Propyl gallate	CCCOC(=O)c1cc(O)c(O)c(O)c1	2.8216
275	Dimethyl sulfate	COS(=O)(=O)OC	2.82206
276	1,4-Phenylenediamine	Nc1ccc(N)cc1	2.82987
277	4-Amino-3-nitrophenol	Nc1ccc(O)cc1N(=O)=O	2.88683
278	Benzyl bromide	C1=CC=C(C=C1)CBr	2.93204
279	Phthalic anhydride	C1=CC=C2C(=C1)C(=O)OC2=O	2.96649
280	Glutaraldehyde	O=CCCCC=O	3.00052
281	Benzoyl peroxide	O=C(OOC(=O)c1ccccc1)c2ccccc2	3.04181
282	1,4-Hydrochinone	Oc1ccc(O)cc1	3.04183
283	Lauryl gallate	CCCCCCCCCCCCOC(=O)c1cc(O)c(O)c(O)c1	3.05236
284	2-((4-(4-(2-Methoxyethoxy)benzyl)phenoxy)methyl)oxirane	COCCOC1=CC=C(C=C1)CC2=CC=C(OCC3OC3)C=C2	3.09163
285	Hexyl salicylate	CCCCCCOC(=O)c1ccccc1O	3.09163
286	Toluene 2,4-diisocyanate	O=C=NC1=CC(N=C=O)=CC=C1C	3.19956
287	2,4-Dinitroiodobenzene	O=N(=O)c1ccc(I)c(N(=O)=O)c1	3.2379
288	Fluorescein-5-isothiocyanate	OC1=CC2=C(C=C1)C3(C(C=CC(N=C=S)=C4)=C4C(O3)=O)C5=C(C=C(O)C=C5)O2	3.44425
289	2,4-Dinitrobromobenzene	O=N(=O)c1ccc(Br)c(N(=O)=O)c1	3.46328
290	4-Nitro-benzene-1,2-diamine	Nc1ccc(N(=O)=O)cc1N	3.48612
291	Diphenylmethane-4,4'-diisocyanate	O=C=NC1=CC=C(C=C1)CC2=CC=C(N=C=O)C=C2	3.49528
292	4-methyl-7-(prop-1-en-2-yl)-1-oxaspiro[2.5]oct-4-ene	CC(=O)CC(=O)c1ccccc1	3.60796
293	Benzoylacetone	CC(=O)CC(=O)c1ccccc1	3.60796
294	4-Nitrobenzylbromide	[O-][N+](=O)c1ccc(CBr)cc1	3.63554
295	2,4-Dinitrothiocyanatobenzene	O=[N+]([O-])C1=C(SC#N)C=CC([N+]([O-])=O)=C1	3.68043
296	2,4,6-Trinitrochlorobenzene	ClC1=C([N+]([O-])=O)C=C([N+]([O-])=O)C=C1[N+]([O-])=O	3.69469
297	1-Chloro-2,4-dinitrobenzene	[O-][N+](=O)c1ccc(Cl)c(c1)[N+](=O)[O-]	3.70447
298	2,4-Dinitrofluorobenzene	O=N(=O)c1ccc(F)c(N(=O)=O)c1	3.7646
299	3-Methylcatechol	OC(C(C)=CC=C1)=C1O	3.79288
300	4-Methylcatechol	CC1=CC=C(O)C(O)=C1	3.79288
301	Tetrachlorsalicylanilide	Oc1c(Cl)cc(Cl)cc1C(=O)Nc2ccc(Cl)c(Cl)c2	3.94326
302	p-Benzoquinone	C1=CC(C=CC1=O)=O	4.03379
303	Bandrowski’s Base	C=1C=C(C=CC=1N)N=C2C=C(C(C=C2N)=NC3=CC=C(C=C3)N)N	4.20192
304	5-Chloro-2-methyl-4-isothiazolin-3-one	O=C1N(C)SC(Cl)=C1	4.22069
305	7,12-Dimethylbenz[a]anthracene	CC1=C(C(C=CC=C2)=C2C=C3)C3=C(C)C4=C1C=CC=C4	4.63067
306	Chlorothalonil	C(C1=C(C(C#N)=C(C(=C1Cl)Cl)Cl)Cl)#N	4.82267
307	Diphenylcyclopropenone	O=C1C(=C1c2ccccc2)c3ccccc3	4.83725
308	Oxazolone	CCOC(=C2C(=O)OC(C1=CC=CC=C1)=N2)[H]	4.85978

## Sheet: Dataset
No.	SCBO	nCsp2	Eta_sh_p	X2sol	nArCO	PDI	Eta_epsi_2	max_conj_path	F04[N-O]	F09[O-O]	pEC3 (LLNA)	Set
107	9	5	0	2.12132	0	0.918237	0.766667	6	0	0	0.040844	Training
109	7	1	0.4	2.09077	0	0.803223	0.809524	0	0	0	0.16691	Training
110	12	4	0.3	4.26397	0	0.896257	0.7	0	0	0	0.49082	Training
112	8	3	0.421053	2.3021	0	0.796309	0.919048	4	0	0	0.553363	Training
113	12	4	0.4375	4.80384	0	0.792841	0.769697	0	0	0	0.554757	Training
115	14	2	0.394737	6.1283	0	0.838397	0.758974	0	0	0	0.578943	Training
116	7	3	0.5	1.92167	0	0.778719	0.955556	4	0	0	0.633923	Training
119	19	7	0.186047	6.16966	0	0.886233	0.802222	6	0	0	0.71786	Training
120	7	2	0.571429	2.48803	0	0.651517	1.21111	4	0	0	0.778296	Training
122	11	3	0.172414	3.12132	0	0.844722	0.776667	0	0	0	0.783198	Training
123	19	1	0.2	7.05893	0	0.855819	0.780702	0	0	0	0.788634	Training
124	14	8	0.0689655	3.64626	0	0.879366	0.776667	8	0	0	0.805468	Training
125	12	4	0.34375	4.2186	0	0.826129	0.769697	0	0	0	0.805848	Training
127	11	3	0.37931	3.83817	0	0.832931	0.776667	0	0	0	0.824591	Training
128	14	2	0.594595	6.76985	0	0.798699	0.817949	0	0	0	0.834114	Training
129	15	3	0.275	5.27926	0	0.839046	0.809524	0	0	0	0.845536	Training
130	17	6	0.421053	5.72706	0	0.830229	0.919048	4	0	0	0.849989	Training
131	12	1	0.411765	4.92342	0	0.80637	0.827778	0	0	0	0.855973	Training
132	15	8	0.1875	4.08367	0	0.907205	0.769697	6	0	0	0.865497	Training
133	12	1	0.382353	5.34674	0	0.778906	0.827778	0	0	0	0.874457	Training
135	16	5	0.425	6.04826	0	0.831791	0.809524	0	0	0	0.894958	Training
136	17	5	0.195122	5.61975	0	0.893033	0.754762	0	0	0	0.903768	Training
138	10	2	0.12	3.29271	0	0.860299	0.87037	0	0	0	0.961658	Training
139	20	3	0.34	8.24878	0	0.880884	0.745098	0	0	0	0.969555	Training
143	19	7	0.318182	6.8328	0	0.872216	0.751111	6	0	0	1.03845	Training
146	23	13	0.0465116	6.11511	0	0.967803	0.802222	8	0	0	1.06415	Training
148	17	3	0.232558	6.74789	0	0.832027	0.802222	0	0	0	1.08986	Training
149	24	13	0.0434783	6.45676	0	0.961493	0.795833	8	0	0	1.09638	Training
150	15	3	0.526316	6.55678	0	0.843605	0.758974	4	0	0	1.09761	Training
151	16	8	0.235294	4.61336	0	0.869723	0.827778	6	0	0	1.10478	Training
153	27	15	0.0384615	7.26794	0	0.957916	0.785185	10	0	0	1.11227	Training
155	7	0	0.588235	4.37132	0	0.812162	1.12778	0	0	0	1.13342	Training
156	12	0	0.25	4.68198	0	0.870403	0.705128	0	0	0	1.14133	Training
158	34	6	0.234604	11.4651	0	0.861041	1.04568	0	10	2	1.20894	Training
159	6	0	0.423077	2.56066	0	0.851124	0.709524	0	0	0	1.21767	Training
160	10	4	0.4	3.36504	0	0.718093	1.08333	6	0	0	1.21962	Training
162	17	8	0.243243	4.80441	0	0.892072	0.817949	8	0	0	1.25098	Training
163	8	3	0.25	2.06066	0	0.822634	0.809524	4	0	0	1.25148	Training
164	21	9	0.106383	5.86335	0	0.911411	0.747917	10	0	0	1.25592	Training
165	20	9	0.113636	5.50979	0	0.912504	0.751111	10	0	0	1.26458	Training
166	14	3	0.297297	4.50727	0	0.83451	0.817949	4	0	0	1.26548	Training
167	13	1	0.210526	4.42342	0	0.844565	0.758974	0	0	0	1.26557	Training
168	14	5	0.25	4.43307	0	0.891614	0.769697	4	0	0	1.26824	Training
169	11	6	0.181818	3.37695	0	0.813032	0.891667	6	0	0	1.26951	Training
170	19	7	0.297872	6.25467	0	0.870308	0.747917	4	0	0	1.27493	Training
171	14	5	0.34375	4.87283	0	0.869679	0.769697	6	0	0	1.30167	Training
173	19	8	0.13587	5.6158	0	0.964257	0.820513	6	0	0	1.31163	Training
174	13	3	0.34375	4.60325	0	0.860978	0.769697	0	0	0	1.31327	Training
176	13	5	0.34375	4.2186	0	0.853217	0.769697	4	0	0	1.31918	Training
178	14	7	0.172414	3.78362	0	0.897765	0.776667	6	0	0	1.32835	Training
179	13	6	0.178571	3.62111	0	0.854618	0.853333	6	0	0	1.36953	Training
180	13	6	0.285714	4.06384	0	0.857192	0.853333	6	0	0	1.37695	Training
181	15	6	0.235294	4.61336	0	0.865037	0.827778	6	0	0	1.38817	Training
182	16	7	0.0645161	4.72284	0	0.971574	0.839394	6	0	0	1.42254	Training
183	11	4	0.4	3.43647	0	0.762016	1.08333	6	0	0	1.42366	Training
184	3	0	0.444444	1	0	0.837018	0.9	0	0	0	1.43645	Training
187	18	0	0.2	8.25152	0	0.868323	0.85098	0	0	0	1.46805	Training
188	12	6	0.25	3.79271	0	0.939654	0.707407	6	0	0	1.47492	Training
189	12	0	0	4.52476	0	0.913498	0.839394	0	0	0	1.47773	Training
191	13	7	0.0769231	3.29271	0	0.916137	0.785185	6	0	0	1.49426	Training
192	6	0	0.25	2.06066	0	0.86587	0.871429	0	0	0	1.49768	Training
194	19	0	0.0862069	6.65685	0	0.84546	0.776667	0	0	0	1.51263	Training
195	11	6	0.196429	3.37695	0	0.889825	0.845833	6	1	0	1.53279	Training
197	12	6	0.291339	3.87279	0	0.89089	0.82963	6	1	0	1.55896	Training
200	18	6	0.297872	6.25467	0	0.850272	0.747917	0	0	0	1.60671	Training
201	5	2	0.4	1	0	0.724723	1.08333	4	0	0	1.6176	Training
202	17	5	0.341463	6.14984	0	0.87621	0.754762	6	0	0	1.62597	Training
203	15	9	0.0689655	3.64626	0	0.922236	0.776667	10	0	0	1.62974	Training
204	17	5	0.341463	6.14984	0	0.866463	0.754762	4	0	0	1.63077	Training
205	19	9	0.195122	5.53762	0	0.902651	0.754762	10	0	0	1.63133	Training
206	2	1	1	0	0	0.663432	1.08333	0	0	0	1.63246	Training
210	10	0	0.4	4.99632	0	0.825538	1.07037	0	0	0	1.66951	Training
212	17	5	0.341463	6.14984	0	0.856931	0.754762	4	0	0	1.73314	Training
215	16	6	0	4.87832	0	0.940638	0.827778	6	0	0	1.76822	Training
216	30	0	0.0581395	10.5459	0	0.836433	0.873118	0	0	4	1.78228	Training
218	13	5	0.172414	3.70325	0	0.890921	0.776667	4	0	0	1.79241	Training
219	19	9	0.128205	5.32879	0	0.888038	0.864286	6	0	0	1.79241	Training
220	15	6	0	4.52476	0	0.961663	0.769697	6	0	0	1.79588	Training
221	16	3	0.268293	6.14016	0	0.862933	0.754762	0	0	0	1.80457	Training
224	14	1	0.235294	4.06986	0	0.839157	0.827778	0	0	0	1.82796	Training
225	12	3	0.275862	4.06384	0	0.870609	0.776667	0	0	0	1.84058	Training
228	20	6	0.304878	5.73397	0	0.830296	1.05641	6	5	0	1.8501	Training
229	16	6	0	4.87832	0	0.940638	0.827778	6	0	0	1.87295	Training
231	25	13	0.0833333	6.98427	0	0.926658	0.835294	8	0	0	1.89599	Training
232	14	4	0.3125	4.36504	0	0.8142	0.955556	6	0	0	1.91376	Training
233	12	6	0.291339	3.87279	0	0.89089	0.82963	6	0	0	1.91434	Training
235	17	1	0.277778	6.93354	0	0.846314	0.794118	0	0	0	1.95604	Training
236	16	8	0.235294	4.61336	0	0.869723	0.827778	8	0	0	1.9601	Training
238	14	5	0.485714	4.72821	0	0.846643	0.763889	6	0	0	2.01667	Training
239	9	1	0.465347	2.82059	0	0.79718	1.04167	0	1	0	2.0272	Training
242	17	6	0	5.23187	0	0.936209	0.817949	6	0	0	2.07489	Training
243	17	0	0	6.29253	0	0.886017	0.891667	0	0	0	2.08354	Training
244	25	6	0.334928	9.06595	0	0.885906	1.10208	6	3	0	2.09372	Training
245	26	0	0.0657895	9.13173	0	0.840184	0.841975	0	0	2	2.14316	Training
247	16	6	0.261497	4.63719	0	0.900364	0.938095	6	0	0	2.23447	Training
248	13	7	0.192308	3.53415	0	0.916137	0.785185	8	0	0	2.24087	Training
250	15	4	0.3125	4.62329	0	0.862063	0.955556	6	0	0	2.27661	Training
251	29	12	0.158033	10.3253	0	0.990938	0.783447	6	0	0	2.32018	Training
252	11	6	0.210526	3.37695	0	0.973526	0.8	6	0	0	2.34379	Training
253	34	12	0.084507	11.2981	0	0.952425	0.822667	6	0	0	2.35591	Training
255	32	12	0	10.0507	0	0.984056	0.833333	6	0	0	2.4442	Training
257	15	6	0	5.10211	0	0.966266	0.793939	6	0	0	2.45656	Training
258	22	0	0.0757576	7.71751	0	0.844948	0.8	0	0	0	2.4574	Training
259	9	3	0.233645	3.52856	0	0.897952	0.904762	4	0	0	2.4592	Training
261	46	6	0.0420168	15.4243	0	0.8573	0.878295	6	0	7	2.49256	Training
262	14	1	0.369056	4.84674	0	0.875231	0.840873	0	0	0	2.4946	Training
264	15	6	0	4.52476	0	0.946213	0.839394	6	0	0	2.51383	Training
266	16	6	0.30137	4.80338	0	0.932411	0.948485	6	2	0	2.58303	Training
268	19	0	0.0545455	6.82824	0	0.878287	0.780702	0	0	0	2.63009	Training
269	23	6	0.295019	9.55425	0	0.92976	0.866667	6	0	0	2.65543	Training
270	12	6	0.302326	3.87279	0	0.962663	0.788889	6	0	0	2.74086	Training
272	13	7	0.230366	4.09745	0	0.922889	0.861376	8	0	0	2.78616	Training
275	8	0	0.526316	4.30698	0	0.802531	1.17619	0	0	0	2.82206	Training
276	11	6	0.210526	3.36504	0	0.973526	0.8	6	0	0	2.82987	Training
277	16	6	0.291667	4.80338	0	0.86592	0.981818	6	3	0	2.88683	Training
278	11	6	0.275862	3.32053	0	0.945709	0.708333	6	0	0	2.93204	Training
279	17	8	0.133333	4.80244	0	0.974304	0.909091	10	0	0	2.96649	Training
283	28	7	0.164179	9.34666	0	0.845079	0.859722	8	0	0	3.05236	Training
284	31	12	0.0461538	9.52571	0	0.947004	0.833333	6	0	0	3.09163	Training
285	20	7	0.155556	6.10577	0	0.869362	0.84375	8	0	0	3.09163	Training
286	20	6	0.195531	4.99379	0	0.902634	0.879487	8	0	0	3.19956	Training
287	20	6	0.439213	6.81468	0	0.913745	0.978755	6	0	0	3.2379	Training
288	44	19	0.136816	13.0872	0	0.984501	0.860714	9	0	0	3.44425	Training
290	16	6	0.30137	4.77172	0	0.932411	0.948485	6	0	0	3.48612	Training
292	17	8	0.205882	5.00492	1	0.906934	0.827778	8	0	0	3.60796	Training
293	17	8	0.205882	5.00492	1	0.906934	0.827778	8	0	0	3.60796	Training
295	24	6	0.252427	6.9303	0	0.87723	1.00222	6	0	0	3.68043	Training
296	25	6	0.392562	7.48369	0	0.860968	1.10536	6	0	0	3.69469	Training
298	20	6	0.29877	5.1748	0	0.872097	1.08315	6	0	0	3.7646	Training
303	36	18	0.140351	10.6693	0	1.03395	0.8	20	0	0	4.20192	Training
305	33.5	18	0.1	8.85735	0	1.08414	0.7	18	0	0	4.63067	Training
307	26	15	0.0425532	6.81	0	1.04741	0.747917	16	0	0	4.83725	Training
308	23	10	0.112613	6.50917	0	0.936917	0.86875	12	0	0	4.85978	Training
108	8	3	0.578947	2.62955	0	0.796309	0.919048	4	0	0	0.0462783	Test
111	13	1	0.297297	4.5657	0	0.831858	0.817949	0	0	0	0.531409	Test
114	11	2	0.34375	4.2186	0	0.813545	0.769697	0	0	0	0.555386	Test
117	9	0	0.12	3.29271	0	0.85486	0.87037	0	0	0	0.667386	Test
118	10	2	0.52	3.85085	0	0.810557	0.87037	4	0	0	0.696167	Test
126	10	3	0.32	3.0092	0	0.819436	0.87037	4	0	0	0.806756	Test
134	7	2	0.625	2.48803	0	0.785286	0.955556	4	0	0	0.881874	Test
137	18	7	0.268293	5.77394	0	0.887216	0.754762	6	0	0	0.931088	Test
140	18	5	0.386364	6.92159	0	0.868692	0.751111	4	0	0	0.976085	Test
142	18	6	0.135135	5.44263	0	0.906815	0.726667	6	0	0	1.02022	Test
145	48	18	0.252427	16.219	0	0.857152	0.865766	6	0	0	1.05656	Test
152	14	5	0.34375	4.77172	0	0.891614	0.769697	4	0	0	1.10485	Test
157	15	4	0.342857	5.78341	0	0.903531	0.763889	0	0	0	1.20264	Test
172	19	9	0.2	5.38577	0	0.901391	0.809524	10	0	0	1.31082	Test
175	27	5	0.25	10.3335	0	0.885103	0.769697	4	0	0	1.31334	Test
185	10	5	0.217391	2.41421	0	0.836176	0.795833	6	0	0	1.43992	Test
186	13	7	0.16	3.59258	0	0.863665	0.87037	8	0	0	1.45332	Test
193	16	9	0.15625	4.25316	0	0.919392	0.769697	10	0	0	1.51171	Test
196	19	0	0.203704	7.88121	0	0.767558	0.915789	0	0	0	1.54963	Test
198	14	5	0.4	4.68757	0	0.846643	0.763889	4	0	0	1.56758	Test
199	16	9	0.15625	4.47523	0	0.919392	0.769697	10	0	0	1.59672	Test
207	18	7	0.268293	6.2259	0	0.880281	0.754762	6	0	0	1.64592	Test
208	13	2	0.514019	7.3313	0	0.861814	0.855556	0	0	0	1.66499	Test
209	6	0	0.424242	2.53608	0	0.837706	0.814286	0	0	0	1.66694	Test
214	17	5	0.341463	6.14984	0	0.866463	0.754762	4	0	0	1.76547	Test
217	12	3	0.15625	3.47487	0	0.849449	0.769697	4	0	0	1.79029	Test
222	12	7	0.128205	2.91228	0	0.92217	0.75	8	0	0	1.81765	Test
226	14	3	0.142857	4.5176	0	0.898846	0.763889	4	0	0	1.84058	Test
227	8	2	0.555556	2.62955	0	0.77236	1.02857	4	0	0	1.8501	Test
230	12	6	0.291339	3.87279	0	0.89089	0.82963	6	0	0	1.88631	Test
237	16	7	0.149701	5.62	0	1.0151	0.793333	9	0	0	1.99292	Test
240	17.5	10	0.0625	4.61658	0	0.966876	0.769697	10	0	0	2.04493	Test
246	18	7	0.341463	6.14984	0	0.880281	0.754762	8	0	0	2.19303	Test
249	14	2	0.133333	4.80244	0	0.904914	0.909091	0	0	0	2.26369	Test
263	15	6	0.25974	4.43307	0	0.89311	0.842424	8	0	0	2.49537	Test
265	13	1	0.258065	3.71631	0	0.83356	0.839394	0	0	0	2.5349	Test
267	12	4	0.384615	3.60419	0	0.794578	1.00667	6	0	0	2.61469	Test
271	17	6	0.307632	6.93929	0	0.928516	0.940476	6	0	0	2.75519	Test
273	10	4	0.222222	3.0234	0	0.858489	1.02857	6	0	0	2.78737	Test
274	19	7	0.275	6.16468	0	0.806033	0.955556	8	0	0	2.8216	Test
281	27	14	0.08	7.3281	0	0.937439	0.87037	8	0	0	3.04181	Test
289	20	6	0.412371	6.44389	0	0.891164	1.00256	6	0	0	3.46328	Test
291	30	12	0.0743494	7.58656	0	0.959087	0.822807	7	0	0	3.49528	Test
294	16	6	0.338983	4.84132	0	0.914099	0.881818	6	0	0	3.63554	Test
297	20	6	0.350163	6.0731	0	0.877505	1.05018	6	0	0	3.70447	Test
301	28	13	0.338054	10.4441	0	0.947279	0.93381	8	1	0	3.94326	Test
306	21	6	0.477612	6.91401	0	0.924482	0.953061	6	0	0	4.82267	Test

## Sheet: Cluster analysis
No.	SCBO	nCsp2	Eta_sh_p	X2sol	nArCO	PDI	Eta_epsi_2	max_conj_path	CVsim(ED)	pEC3 (LLNA)	Set	Cluster	Pred	Abs Res	CVFit1	PResid1	AbsPres		Training	Cluster	MAE		Test	Cluster	MAE		Train-LOO	Cluster
307	26	15	0.0425532	6.81	0	1.04741	0.747917	16	0.0516046	4.83725	Training	1	3.57609	1.26116	3.45103	1.38623	1.38623			1	0.446819	Low		1	0.835422	High		1	0.507961	Medium
305	33.5	18	0.1	8.85735	0	1.08414	0.7	18	0.107096	4.63067	Training	1	4.12227	0.50839	3.98262	0.64805	0.64805			2	0.240076	Low		2	0.52211	Medium		2	0.252135	Low
303	36	18	0.140351	10.6693	0	1.03395	0.8	20	0.101968	4.20192	Training	1	4.21007	0.00815253	4.20703	-0.00511	0.00511			3	0.460894	Low		3	0.373286	Low		3	0.482377	Low
292	17	8	0.205882	5.00492	1	0.906934	0.827778	8	0.396628	3.60796	Training	1	3.55176	0.056206	3.51109	0.09687	0.09687			4	0.431499	Low		4	0.79047	High		4	0.493727	Low
293	17	8	0.205882	5.00492	1	0.906934	0.827778	8	0.396628	3.60796	Training	1	3.55176	0.056206	3.51109	0.09687	0.09687			5	0.384226	Low		5	0.41049	Low		5	0.428069	Low
288	44	19	0.136816	13.0872	0	0.984501	0.860714	9	0.0711019	3.44425	Training	1	2.9751	0.469147	2.77639	0.66786	0.66786			6	0.373425	Low		6	0.639832	Medium		6	0.40547	Low
284	31	12	0.0461538	9.52571	0	0.947004	0.833333	6	0.0704947	3.09163	Training	1	2.06608	1.02555	1.9859	1.10573	1.10573		Test	1	0.835422
255	32	12	0	10.0507	0	0.984056	0.833333	6	0.0891073	2.4442	Training	1	2.34082	0.103379	2.332	0.1122	0.1122			2	0.52211
253	34	12	0.084507	11.2981	0	0.952425	0.822667	6	0.0896015	2.35591	Training	1	2.14981	0.206106	2.13577	0.22014	0.22014			3	0.373286
251	29	12	0.158033	10.3253	0	0.990938	0.783447	6	0.0675604	2.32018	Training	1	2.07815	0.242034	2.05366	0.26652	0.26652			4	0.79047
231	25	13	0.0833333	6.98427	0	0.926658	0.835294	8	0.0434746	1.89599	Training	1	1.69008	0.205913	1.67162	0.22437	0.22437			5	0.41049
153	27	15	0.0384615	7.26794	0	0.957916	0.785185	10	0.051652	1.11227	Training	1	1.84368	0.731414	1.90865	-0.79638	0.79638			6	0.639832
149	24	13	0.0434783	6.45676	0	0.961493	0.795833	8	0.0604524	1.09638	Training	1	1.75983	0.663455	1.80845	-0.71207	0.71207
146	23	13	0.0465116	6.11511	0	0.967803	0.802222	8	0.058064	1.06415	Training	1	1.78251	0.718357	1.83721	-0.77306	0.77306
Mean	28.4643	13.4286	0.0951403	8.38983	0.142857	0.975155	0.803964	9.78571	0.118245	2.83648				0.446819			0.507961
259	9	3	0.233645	3.52856	0	0.897952	0.904762	4	0.0077455	2.4592	Training	2	1.92359	0.535617	1.90009	0.55911	0.55911
243	17	0	0	6.29253	0	0.886017	0.891667	0	0.0371339	2.08354	Training	2	1.91988	0.163662	1.90902	0.17452	0.17452
225	12	3	0.275862	4.06384	0	0.870609	0.776667	0	0.013444	1.84058	Training	2	1.10538	0.735201	1.08316	0.75742	0.75742
224	14	1	0.235294	4.06986	0	0.839157	0.827778	0	0.0173014	1.82796	Training	2	1.65815	0.169812	1.64964	0.17832	0.17832
192	6	0	0.25	2.06066	0	0.86587	0.871429	0	0.0154461	1.49768	Training	2	1.46294	0.034738	1.46214	0.03554	0.03554
189	12	0	0	4.52476	0	0.913498	0.839394	0	0.0320981	1.47773	Training	2	1.6575	0.179768	1.67367	-0.19594	0.19594
184	3	0	0.444444	1	0	0.837018	0.9	0	0.0320397	1.43645	Training	2	1.35146	0.0849886	1.33994	0.09651	0.09651
167	13	1	0.210526	4.42342	0	0.844565	0.758974	0	0.019965	1.26557	Training	2	1.12576	0.13981	1.12283	0.14275	0.14275
163	8	3	0.25	2.06066	0	0.822634	0.809524	4	0.00780681	1.25148	Training	2	1.00948	0.241999	1.00218	0.2493	0.2493
159	6	0	0.423077	2.56066	0	0.851124	0.709524	0	0.0197682	1.21767	Training	2	1.00511	0.212561	0.98491	0.23276	0.23276
156	12	0	0.25	4.68198	0	0.870403	0.705128	0	0.02056	1.14133	Training	2	1.31773	0.1764	1.32772	-0.18639	0.18639
138	10	2	0.12	3.29271	0	0.860299	0.87037	0	0.0218749	0.961658	Training	2	0.967615	0.00595675	0.96855	-0.00689	0.00689
127	11	3	0.37931	3.83817	0	0.832931	0.776667	0	0.0235773	0.824591	Training	2	0.742097	0.0824937	0.74089	0.0837	0.0837
122	11	3	0.172414	3.12132	0	0.844722	0.776667	0	0.0194702	0.783198	Training	2	0.61304	0.170158	0.60377	0.17943	0.17943
109	7	1	0.4	2.09077	0	0.803223	0.809524	0	0.0134787	0.16691	Training	2	0.834879	0.667969	0.87035	-0.70344	0.70344
Mean	10.0667	1.33333	0.242972	3.44066	0	0.856002	0.815205	0.533333	0.020114	1.34904				0.240076			0.252135
308	23	10	0.112613	6.50917	0	0.936917	0.86875	12	0.0170982	4.85978	Training	3	3.16512	1.69466	3.06859	1.79119	1.79119
290	16	6	0.30137	4.77172	0	0.932411	0.948485	6	0.0315138	3.48612	Training	3	3.05704	0.429081	3.0374	0.44872	0.44872
286	20	6	0.195531	4.99379	0	0.902634	0.879487	8	0.0124809	3.19956	Training	3	3.29754	0.0979854	3.31424	-0.11468	0.11468
285	20	7	0.155556	6.10577	0	0.869362	0.84375	8	0.0224373	3.09163	Training	3	2.07475	1.01688	2.04099	1.05064	1.05064
279	17	8	0.133333	4.80244	0	0.974304	0.909091	10	0.0156727	2.96649	Training	3	3.34985	0.383357	3.37849	-0.412	0.412
278	11	6	0.275862	3.32053	0	0.945709	0.708333	6	0.0308724	2.93204	Training	3	1.83308	1.09896	1.76349	1.16855	1.16855
277	16	6	0.291667	4.80338	0	0.86592	0.981818	6	0.0562838	2.88683	Training	3	2.24226	0.644572	2.23051	0.65632	0.65632
276	11	6	0.210526	3.36504	0	0.973526	0.8	6	0.0379933	2.82987	Training	3	2.25857	0.571299	2.21772	0.61215	0.61215
272	13	7	0.230366	4.09745	0	0.922889	0.861376	8	0.0116933	2.78616	Training	3	2.24203	0.54413	2.22845	0.55771	0.55771
270	12	6	0.302326	3.87279	0	0.962663	0.788889	6	0.0244463	2.74086	Training	3	2.41856	0.322295	2.40121	0.33964	0.33964
266	16	6	0.30137	4.80338	0	0.932411	0.948485	6	0.0331317	2.58303	Training	3	3.04029	0.457263	3.06884	-0.48581	0.48581
264	15	6	0	4.52476	0	0.946213	0.839394	6	0.0452455	2.51383	Training	3	1.95138	0.562442	1.92722	0.5866	0.5866
257	15	6	0	5.10211	0	0.966266	0.793939	6	0.0455477	2.45656	Training	3	1.86368	0.592875	1.82776	0.6288	0.6288
252	11	6	0.210526	3.37695	0	0.973526	0.8	6	0.0379781	2.34379	Training	3	2.2551	0.0886898	2.24621	0.09758	0.09758
250	15	4	0.3125	4.62329	0	0.862063	0.955556	6	0.0253585	2.27661	Training	3	2.64845	0.371834	2.66445	-0.38784	0.38784
248	13	7	0.192308	3.53415	0	0.916137	0.785185	8	0.0154576	2.24087	Training	3	1.96998	0.270892	1.96675	0.27412	0.27412
247	16	6	0.261497	4.63719	0	0.900364	0.938095	6	0.0232605	2.23447	Training	3	2.62831	0.393847	2.64348	-0.40901	0.40901
242	17	6	0	5.23187	0	0.936209	0.817949	6	0.0447874	2.07489	Training	3	1.93942	0.135469	1.938	0.13689	0.13689
236	16	8	0.235294	4.61336	0	0.869723	0.827778	8	0.0235187	1.9601	Training	3	1.64587	0.314228	1.64149	0.31861	0.31861
233	12	6	0.291339	3.87279	0	0.89089	0.82963	6	0.012367	1.91434	Training	3	1.73982	0.174528	1.73983	0.17451	0.17451
229	16	6	0	4.87832	0	0.940638	0.827778	6	0.0499507	1.87295	Training	3	1.91334	0.0403937	1.91835	-0.04539	0.04539
220	15	6	0	4.52476	0	0.961663	0.769697	6	0.0375097	1.79588	Training	3	1.9377	0.141818	1.94724	-0.15136	0.15136
218	13	5	0.172414	3.70325	0	0.890921	0.776667	4	0.019939	1.79241	Training	3	1.44572	0.346695	1.57852	0.2139	0.2139
219	19	9	0.128205	5.32879	0	0.888038	0.864286	6	0.0169423	1.79241	Training	3	1.5892	0.203211	1.44115	0.35126	0.35126
215	16	6	0	4.87832	0	0.940638	0.827778	6	0.0499507	1.76822	Training	3	1.91334	0.145129	1.92282	-0.15461	0.15461
205	19	9	0.195122	5.53762	0	0.902651	0.754762	10	0.0318234	1.63133	Training	3	1.99899	0.367666	2.01907	-0.38774	0.38774
203	15	9	0.0689655	3.64626	0	0.922236	0.776667	10	0.018665	1.62974	Training	3	1.85015	0.220413	1.86419	-0.23445	0.23445
197	12	6	0.291339	3.87279	0	0.89089	0.82963	6	0.0214428	1.55896	Training	3	1.69863	0.139674	1.70422	-0.14527	0.14527
195	11	6	0.196429	3.37695	0	0.889825	0.845833	6	0.0201903	1.53279	Training	3	1.47173	0.0610652	1.4731	0.0597	0.0597
191	13	7	0.0769231	3.29271	0	0.916137	0.785185	6	0.0122036	1.49426	Training	3	1.49426	6.13731e-07	1.49734	-0.00308	0.00308
188	12	6	0.25	3.79271	0	0.939654	0.707407	6	0.0266415	1.47492	Training	3	1.76766	0.292737	1.78275	-0.30783	0.30783
182	16	7	0.0645161	4.72284	0	0.971574	0.839394	6	0.0272472	1.42254	Training	3	2.37612	0.953573	2.41942	-0.99687	0.99687
181	15	6	0.235294	4.61336	0	0.865037	0.827778	6	0.0158748	1.38817	Training	3	1.63562	0.247441	1.64278	-0.2546	0.2546
180	13	6	0.285714	4.06384	0	0.857192	0.853333	6	0.0199232	1.37695	Training	3	1.51035	0.133398	1.51584	-0.13888	0.13888
179	13	6	0.178571	3.62111	0	0.854618	0.853333	6	0.0176358	1.36953	Training	3	1.36373	0.00580395	1.36665	0.00288	0.00288
178	14	7	0.172414	3.78362	0	0.897765	0.776667	6	0.0185898	1.32835	Training	3	1.49821	0.169861	1.50519	-0.17685	0.17685
173	19	8	0.13587	5.6158	0	0.964257	0.820513	6	0.0158868	1.31163	Training	3	2.51941	1.20778	2.56281	-1.25118	1.25118
171	14	5	0.34375	4.87283	0	0.869679	0.769697	6	0.0119176	1.30167	Training	3	1.75181	0.450147	1.77165	-0.46999	0.46999
169	11	6	0.181818	3.37695	0	0.813032	0.891667	6	0.0243663	1.26951	Training	3	0.668433	0.601072	0.61944	0.65006	0.65006
168	14	5	0.25	4.43307	0	0.891614	0.769697	4	0.0156978	1.26824	Training	3	1.61241	0.344165	1.62032	-0.35208	0.35208
165	20	9	0.113636	5.50979	0	0.912504	0.751111	10	0.0443857	1.26458	Training	3	2.04925	0.784671	2.08831	-0.82373	0.82373
164	21	9	0.106383	5.86335	0	0.911411	0.747917	10	0.0459744	1.25592	Training	3	2.0882	0.832285	2.1316	-0.87569	0.87569
162	17	8	0.243243	4.80441	0	0.892072	0.817949	8	0.0186126	1.25098	Training	3	2.05215	0.80117	2.07273	-0.82175	0.82175
151	16	8	0.235294	4.61336	0	0.869723	0.827778	6	0.016688	1.10478	Training	3	1.39287	0.288087	1.40252	-0.29774	0.29774
143	19	7	0.318182	6.8328	0	0.872216	0.751111	6	0.032981	1.03845	Training	3	1.4549	0.416451	1.47721	-0.43876	0.43876
132	15	8	0.1875	4.08367	0	0.907205	0.769697	6	0.0201786	0.865497	Training	3	1.47495	0.609451	1.49311	-0.62761	0.62761
124	14	8	0.0689655	3.64626	0	0.879366	0.776667	8	0.0212876	0.805468	Training	3	1.10265	0.297179	1.12372	-0.31825	0.31825
119	19	7	0.186047	6.16966	0	0.886233	0.802222	6	0.0115533	0.71786	Training	3	1.76346	1.0456	1.79056	-1.0727	1.0727
107	9	5	0	2.12132	0	0.918237	0.766667	6	0.0178871	0.040844	Training	3	1.31244	1.2716	1.40173	-1.36088	1.36088
Mean	15.2041	6.71429	0.177563	4.50087	0	0.910146	0.822548	6.73469	0.0258998	1.90005				0.460894			0.482377
275	8	0	0.526316	4.30698	0	0.802531	1.17619	0	0.0742087	2.82206	Training	4	1.84214	0.97993	1.67364	1.14843	1.14843
239	9	1	0.465347	2.82059	0	0.79718	1.04167	0	0.0292228	2.0272	Training	4	1.78322	0.243983	1.76834	0.25886	0.25886
232	14	4	0.3125	4.36504	0	0.8142	0.955556	6	0.0255855	1.91376	Training	4	1.97097	0.057202	1.97629	-0.06253	0.06253
210	10	0	0.4	4.99632	0	0.825538	1.07037	0	0.0432305	1.66951	Training	4	1.77807	0.108557	1.78971	-0.12019	0.12019
206	2	1	1	0	0	0.663432	1.08333	0	0.0422379	1.63246	Training	4	1.07631	0.556144	0.85372	0.77874	0.77874
201	5	2	0.4	1	0	0.724723	1.08333	4	0.04263	1.6176	Training	4	0.95051	0.667089	0.8786	0.739	0.739
183	11	4	0.4	3.43647	0	0.762016	1.08333	6	0.0487346	1.42366	Training	4	1.5864	0.162737	1.60283	-0.17917	0.17917
160	10	4	0.4	3.36504	0	0.718093	1.08333	6	0.0597211	1.21962	Training	4	0.850805	0.368817	0.7968	0.42282	0.42282
155	7	0	0.588235	4.37132	0	0.812162	1.12778	0	0.0714307	1.13342	Training	4	1.74613	0.612705	1.85105	-0.71763	0.71763
120	7	2	0.571429	2.48803	0	0.651517	1.21111	4	0.0532087	0.778296	Training	4	0.821145	0.0428493	0.83441	-0.05611	0.05611
116	7	3	0.5	1.92167	0	0.778719	0.955556	4	0.0401494	0.633923	Training	4	1.28164	0.647718	1.31694	-0.68302	0.68302
112	8	3	0.421053	2.3021	0	0.796309	0.919048	4	0.034085	0.553363	Training	4	1.28363	0.730263	1.31158	-0.75822	0.75822
Mean	8.16667	2	0.49874	2.9478	0	0.762201	1.06588	2.83333	0.0470371	1.45207				0.431499			0.493727
268	19	0	0.0545455	6.82824	0	0.878287	0.780702	0	0.0410488	2.63009	Training	5	1.80182	0.828271	1.74668	0.88341	0.88341
262	14	1	0.369056	4.84674	0	0.875231	0.840873	0	0.0128903	2.4946	Training	5	2.23607	0.258533	2.2214	0.27321	0.27321
258	22	0	0.0757576	7.71751	0	0.844948	0.8	0	0.0525337	2.4574	Training	5	1.78553	0.671872	1.73102	0.72638	0.72638
245	26	0	0.0657895	9.13173	0	0.840184	0.841975	0	0.0362828	2.14316	Training	5	2.26584	0.122677	2.31412	-0.17095	0.17095
238	14	5	0.485714	4.72821	0	0.846643	0.763889	6	0.0236958	2.01667	Training	5	1.79436	0.22231	1.78692	0.22975	0.22975
235	17	1	0.277778	6.93354	0	0.846314	0.794118	0	0.0260921	1.95604	Training	5	1.41903	0.537007	1.39963	0.55641	0.55641
221	16	3	0.268293	6.14016	0	0.862933	0.754762	0	0.0113671	1.80457	Training	5	1.08563	0.718938	1.06488	0.73969	0.73969
212	17	5	0.341463	6.14984	0	0.856931	0.754762	4	0.0329647	1.73314	Training	5	1.3648	0.368343	1.35691	0.37623	0.37623
204	17	5	0.341463	6.14984	0	0.866463	0.754762	4	0.0340036	1.63077	Training	5	1.47183	0.158932	1.47065	0.16012	0.16012
202	17	5	0.341463	6.14984	0	0.87621	0.754762	6	0.0288986	1.62597	Training	5	1.89327	0.267298	1.91346	-0.28749	0.28749
200	18	6	0.297872	6.25467	0	0.850272	0.747917	0	0.0124307	1.60671	Training	5	0.602088	1.00463	0.52583	1.08088	1.08088
194	19	0	0.0862069	6.65685	0	0.84546	0.776667	0	0.0389776	1.51263	Training	5	1.54027	0.0276437	1.54582	-0.03319	0.03319
187	18	0	0.2	8.25152	0	0.868323	0.85098	0	0.0279094	1.46805	Training	5	1.71244	0.244391	1.74132	-0.27327	0.27327
176	13	5	0.34375	4.2186	0	0.853217	0.769697	4	0.0145102	1.31918	Training	5	1.26536	0.053819	1.26689	0.05229	0.05229
174	13	3	0.34375	4.60325	0	0.860978	0.769697	0	0.0168983	1.31327	Training	5	1.14926	0.164004	1.14588	0.16738	0.16738
170	19	7	0.297872	6.25467	0	0.870308	0.747917	4	0.0287508	1.27493	Training	5	1.27993	0.0050049	1.28328	-0.00835	0.00835
166	14	3	0.297297	4.50727	0	0.83451	0.817949	4	0.0122743	1.26548	Training	5	1.69563	0.43015	1.71045	-0.44497	0.44497
150	15	3	0.526316	6.55678	0	0.843605	0.758974	4	0.0165951	1.09761	Training	5	1.72355	0.625943	1.8055	-0.70789	0.70789
148	17	3	0.232558	6.74789	0	0.832027	0.802222	0	0.0273683	1.08986	Training	5	0.732598	0.357266	0.7182	0.37166	0.37166
139	20	3	0.34	8.24878	0	0.880884	0.745098	0	0.0173488	0.969555	Training	5	1.55168	0.582128	1.59501	-0.62546	0.62546
136	17	5	0.195122	5.61975	0	0.893033	0.754762	0	0.017004	0.903768	Training	5	1.09709	0.193318	1.10198	-0.19821	0.19821
135	16	5	0.425	6.04826	0	0.831791	0.809524	0	0.0126047	0.894958	Training	5	0.814674	0.0802845	0.80714	0.08782	0.08782
133	12	1	0.382353	5.34674	0	0.778906	0.827778	0	0.0290549	0.874457	Training	5	0.489751	0.384705	0.47022	0.40423	0.40423
131	12	1	0.411765	4.92342	0	0.80637	0.827778	0	0.0222872	0.855973	Training	5	1.0391	0.183124	1.04556	-0.18958	0.18958
130	17	6	0.421053	5.72706	0	0.830229	0.919048	4	0.0167799	0.849989	Training	5	1.74162	0.891626	1.77343	-0.92344	0.92344
129	15	3	0.275	5.27926	0	0.839046	0.809524	0	0.00997184	0.845536	Training	5	1.07242	0.226886	1.08023	-0.23469	0.23469
128	14	2	0.594595	6.76985	0	0.798699	0.817949	0	0.0297677	0.834114	Training	5	0.916192	0.0820775	0.92655	-0.09243	0.09243
125	12	4	0.34375	4.2186	0	0.826129	0.769697	0	0.0235813	0.805848	Training	5	0.389612	0.416235	0.37184	0.43401	0.43401
123	19	1	0.2	7.05893	0	0.855819	0.780702	0	0.0239674	0.788634	Training	5	1.65509	0.866454	1.69964	-0.91101	0.91101
115	14	2	0.394737	6.1283	0	0.838397	0.758974	0	0.00783277	0.578943	Training	5	0.99528	0.416337	1.01775	-0.43881	0.43881
113	12	4	0.4375	4.80384	0	0.792841	0.769697	0	0.0236203	0.554757	Training	5	0.0513838	0.503373	0.0169	0.53785	0.53785
110	12	4	0.3	4.26397	0	0.896257	0.7	0	0.0170631	0.49082	Training	5	0.892481	0.40166	0.91722	-0.4264	0.4264
Mean	16.1562	3	0.311494	6.0395	0	0.847539	0.786661	1.25	0.0233243	1.33398				0.384226			0.428069
298	20	6	0.29877	5.1748	0	0.872097	1.08315	6	0.0365264	3.7646	Training	6	3.41343	0.351163	3.37624	0.38836	0.38836
296	25	6	0.392562	7.48369	0	0.860968	1.10536	6	0.065681	3.69469	Training	6	3.72431	0.0296161	3.73707	-0.04238	0.04238
295	24	6	0.252427	6.9303	0	0.87723	1.00222	6	0.0257895	3.68043	Training	6	3.39024	0.290189	3.38127	0.29916	0.29916
287	20	6	0.439213	6.81468	0	0.913745	0.978755	6	0.02755	3.2379	Training	6	3.44962	0.211718	3.47364	-0.23574	0.23574
283	28	7	0.164179	9.34666	0	0.845079	0.859722	8	0.0274066	3.05236	Training	6	2.41443	0.637926	2.36244	0.68992	0.68992
269	23	6	0.295019	9.55425	0	0.92976	0.866667	6	0.0177542	2.65543	Training	6	2.72675	0.0713201	2.74309	-0.08767	0.08767
261	46	6	0.0420168	15.4243	0	0.8573	0.878295	6	0.308984	2.49256	Training	6	2.6566	0.164042	2.75574	-0.26318	0.26318
244	25	6	0.334928	9.06595	0	0.885906	1.10208	6	0.0658017	2.09372	Training	6	3.39646	1.30274	3.5584	-1.46468	1.46468
228	20	6	0.304878	5.73397	0	0.830296	1.05641	6	0.131942	1.8501	Training	6	2.2508	0.400699	2.28286	-0.43276	0.43276
216	30	0	0.0581395	10.5459	0	0.836433	0.873118	0	0.191942	1.78228	Training	6	1.94776	0.16548	1.9928	-0.21052	0.21052
158	34	6	0.234604	11.4651	0	0.861041	1.04568	0	0.318928	1.20894	Training	6	1.69173	0.48279	1.55475	-0.3458	0.3458
Mean	26.8182	5.54545	0.256067	8.86724	0	0.869987	0.986496	5.09091	0.110755	2.683				0.373425			0.40547
301	28	13	0.338054	10.4441	0	0.947279	0.93381	8	0.0331516	3.94326	Test	1	2.46625	1.47701
291	30	12	0.0743494	7.58656	0	0.959087	0.822807	7	0.0409333	3.49528	Test	1	2.90107	0.59421
281	27	14	0.08	7.3281	0	0.937439	0.87037	8	0.0567974	3.04181	Test	1	1.90257	1.13924
145	48	18	0.252427	16.219	0	0.857152	0.865766	6	0.124984	1.05656	Test	1	1.18779	0.13123
Mean	33.25	14.25	0.186208	10.3944	0	0.925239	0.873188	7.25	0.0639666	2.88423				0.835422
265	13	1	0.258065	3.71631	0	0.83356	0.839394	0	0.0240588	2.5349	Test	2	1.56808	0.966816
249	14	2	0.133333	4.80244	0	0.904914	0.909091	0	0.0238525	2.26369	Test	2	1.9612	0.302493
217	12	3	0.15625	3.47487	0	0.849449	0.769697	4	0.0152397	1.79029	Test	2	1.28069	0.509592
209	6	0	0.424242	2.53608	0	0.837706	0.814286	0	0.0306815	1.66694	Test	2	1.15399	0.512949
126	10	3	0.32	3.0092	0	0.819436	0.87037	4	0.0202078	0.806756	Test	2	1.38751	0.58075
117	9	0	0.12	3.29271	0	0.85486	0.87037	0	0.0362263	0.667386	Test	2	1.13272	0.46533
114	11	2	0.34375	4.2186	0	0.813545	0.769697	0	0.0179651	0.555386	Test	2	0.56157	0.00618325
111	13	1	0.297297	4.5657	0	0.831858	0.817949	0	0.01426	0.531409	Test	2	1.36418	0.832769
Mean	11	1.5	0.256617	3.70199	0	0.843166	0.832607	1	0.0228115	1.35209				0.52211
294	16	6	0.338983	4.84132	0	0.914099	0.881818	6	0.0171239	3.63554	Test	3	2.75772	0.877824
271	17	6	0.307632	6.93929	0	0.928516	0.940476	6	0.0310043	2.75519	Test	3	2.55058	0.204604
263	15	6	0.25974	4.43307	0	0.89311	0.842424	8	0.0125261	2.49537	Test	3	2.42474	0.070629
246	18	7	0.341463	6.14984	0	0.880281	0.754762	8	0.0210413	2.19303	Test	3	1.96666	0.226377
240	17.5	10	0.0625	4.61658	0	0.966876	0.769697	10	0.0211612	2.04493	Test	3	2.27242	0.227486
230	12	6	0.291339	3.87279	0	0.89089	0.82963	6	0.0277082	1.88631	Test	3	1.6702	0.216118
226	14	3	0.142857	4.5176	0	0.898846	0.763889	4	0.0268676	1.84058	Test	3	1.82992	0.0106604
222	12	7	0.128205	2.91228	0	0.92217	0.75	8	0.0196211	1.81765	Test	3	1.74388	0.0737655
207	18	7	0.268293	6.2259	0	0.880281	0.754762	6	0.0229017	1.64592	Test	3	1.47521	0.170718
199	16	9	0.15625	4.47523	0	0.919392	0.769697	10	0.0195609	1.59672	Test	3	1.94599	0.349278
193	16	9	0.15625	4.25316	0	0.919392	0.769697	10	0.0187645	1.51171	Test	3	2.01556	0.503859
186	13	7	0.16	3.59258	0	0.863665	0.87037	8	0.0144209	1.45332	Test	3	1.54528	0.0919626
185	10	5	0.217391	2.41421	0	0.836176	0.795833	6	0.016151	1.43992	Test	3	1.0836	0.356325
172	19	9	0.2	5.38577	0	0.901391	0.809524	10	0.0248653	1.31082	Test	3	2.25332	0.942498
142	18	6	0.135135	5.44263	0	0.906815	0.726667	6	0.0159245	1.02022	Test	3	1.87986	0.859639
137	18	7	0.268293	5.77394	0	0.887216	0.754762	6	0.0160295	0.931088	Test	3	1.72193	0.790838
Mean	15.5938	6.875	0.214646	4.74039	0	0.90057	0.799	7.375	0.0203545	1.84865				0.373286
273	10	4	0.222222	3.0234	0	0.858489	1.02857	6	0.0225598	2.78737	Test	4	2.15764	0.629735
267	12	4	0.384615	3.60419	0	0.794578	1.00667	6	0.0379004	2.61469	Test	4	1.8695	0.745188
227	8	2	0.555556	2.62955	0	0.77236	1.02857	4	0.0348371	1.8501	Test	4	1.83078	0.0193258
134	7	2	0.625	2.48803	0	0.785286	0.955556	4	0.0448278	0.881874	Test	4	1.71357	0.831694
118	10	2	0.52	3.85085	0	0.810557	0.87037	4	0.0196914	0.696167	Test	4	1.76099	1.06482
108	8	3	0.578947	2.62955	0	0.796309	0.919048	4	0.0492281	0.0462783	Test	4	1.49834	1.45206
Mean	9.16667	2.83333	0.481057	3.03759	0	0.80293	0.968131	4.66667	0.0348408	1.47941				0.79047
214	17	5	0.341463	6.14984	0	0.866463	0.754762	4	0.0400954	1.76547	Test	5	1.44419	0.321275
208	13	2	0.514019	7.3313	0	0.861814	0.855556	0	0.0228198	1.66499	Test	5	1.25874	0.406249
198	14	5	0.4	4.68757	0	0.846643	0.763889	4	0.0236835	1.56758	Test	5	1.31583	0.251748
196	19	0	0.203704	7.88121	0	0.767558	0.915789	0	0.0231356	1.54963	Test	5	1.07746	0.472165
157	15	4	0.342857	5.78341	0	0.903531	0.763889	0	0.013189	1.20264	Test	5	1.43417	0.231528
152	14	5	0.34375	4.77172	0	0.891614	0.769697	4	0.0204081	1.10485	Test	5	1.71649	0.61164
140	18	5	0.386364	6.92159	0	0.868692	0.751111	4	0.0344564	0.976085	Test	5	1.55491	0.578826
Mean	15.7143	3.71429	0.361737	6.21809	0	0.858045	0.796385	2.28571	0.0253982	1.40446				0.41049
306	21	6	0.477612	6.91401	0	0.924482	0.953061	6	0.0518164	4.82267	Test	6	3.6357	1.18698
297	20	6	0.350163	6.0731	0	0.877505	1.05018	6	0.0434017	3.70447	Test	6	3.194	0.510476
289	20	6	0.412371	6.44389	0	0.891164	1.00256	6	0.0424469	3.46328	Test	6	3.24124	0.222042
Mean	20.3333	6	0.413382	6.477	0	0.897717	1.00194	6	0.0458883	3.99681				0.639832
