# Supplementary material for: Read-across-based intelligent learning: development of a global q-RASAR model for the efficient quantitative predictions of skin sensitization potential of diverse organic chemicals
Source: Royal Society of Chemistry journal article supplement (doi:10.1039/d3em00322a), 2023-01-01
Supplement: d3em00322a2.pdf [file d3em00322a2.pdf]

**Read-across-based intelligent learning: Development  
of a global q-RASAR model for the efficient  
quantitative predictions of skin sensitization potential  
of diverse organic chemicals**

**Arkaprava Banerjee, Kunal Roy\***

**Drug Theoretics and Cheminformatics Laboratory, Department of Pharmaceutical  
Technology, Jadavpur University, Kolkata 700032, India**

**Email: [kunal.roy@jadavpuruniversity.in](mailto:kunal.roy@jadavpuruniversity.in)**

*Supplementary Material SI-2*

## The PLS QSAR model

$pEC_3$

$$= -11.497 + 0.165 \times SCBO - 0.248 \times nCsp2 + 2.165 \times Eta\_sh\_p - 0.1 \times nArCO + 10.370 \times PDI + 3.110 \times Eta\_epsi\_2 + 0.152 \times max\_conj\_path \\ \times -0.146 \times F04[N-O] - 0.316 \times F09[O-O]$$

$$R_{Train}^2 = 0.696$$

$$Q_{LOO}^2 = 0.644$$

$$MAE_{Train} = 0.410$$

$$Q_{F1}^2 = 0.526$$

$$Q_{F2}^2 = 0.524$$

$$MAE_{Test} = 0.562$$

SCBO: sum of conventional bond orders (H-depleted)

nCsp2: number of sp2 hybridized Carbon atoms

Eta\_sh\_p: eta p shape index

X2sol: solvation connectivity index of order 2

nArCO: number of ketones (aromatic)

PDI: packing density index

Eta\_epsi\_2: eta electronegativity measure 2

max\_conj\_path: maximum number of atoms that can be in conjugation with each other

F04[N-O]: frequency of N – O at topological distance 4

F09[O-O]: frequency of O – O at topological distance 9

### Coefficient Plot CoeffCS[Comp. 8](YVar pEC3 (LLNA))

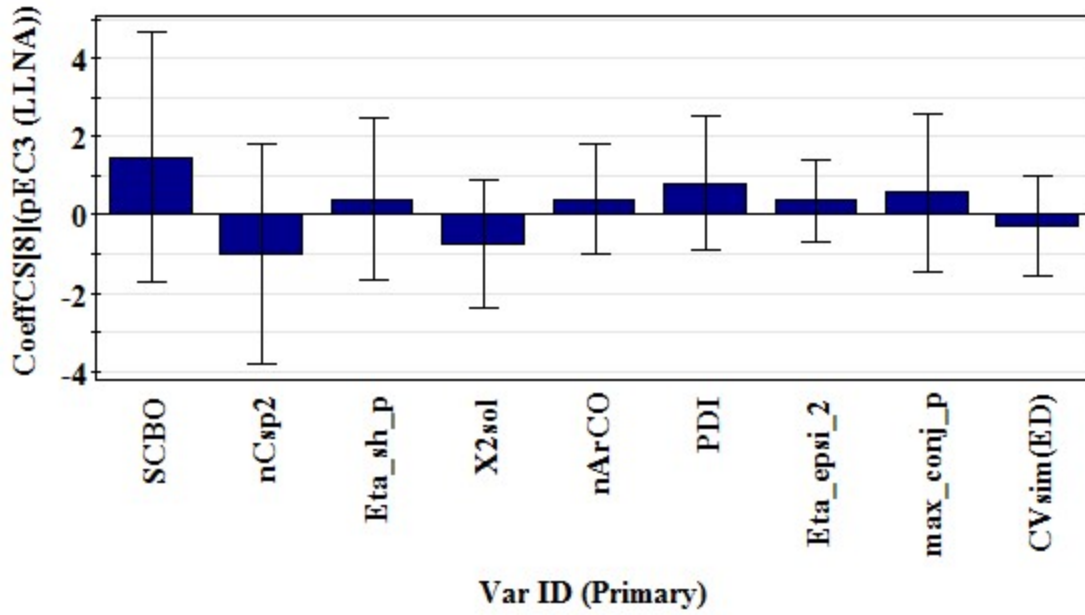

Figure S1. Regression Coefficient Plot

**DModX AD Plot (TRAIN)  
DModXPS[Comp. 8]**

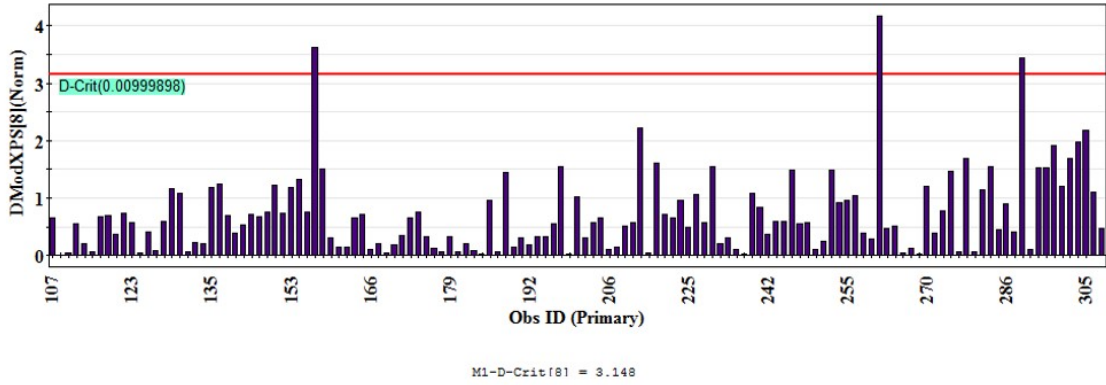

**DModX AD Plot (TEST)  
DModXPS[Comp. 8]**

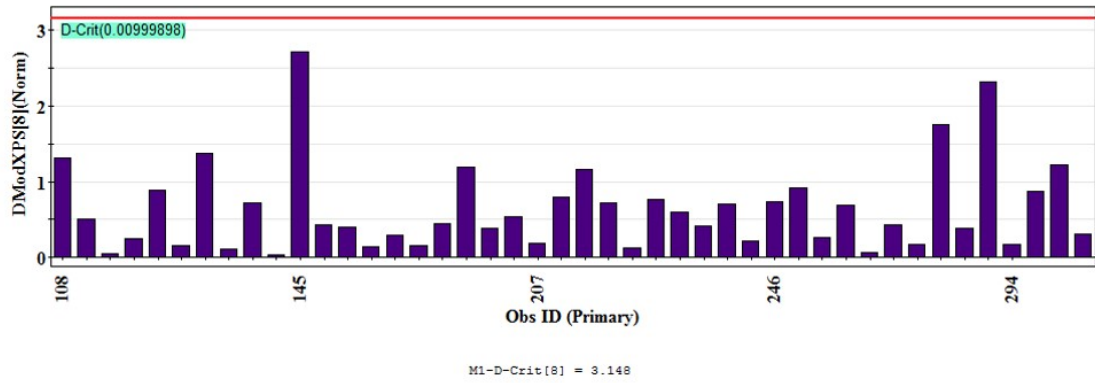

**Figure S2.** The DModX AD Plots

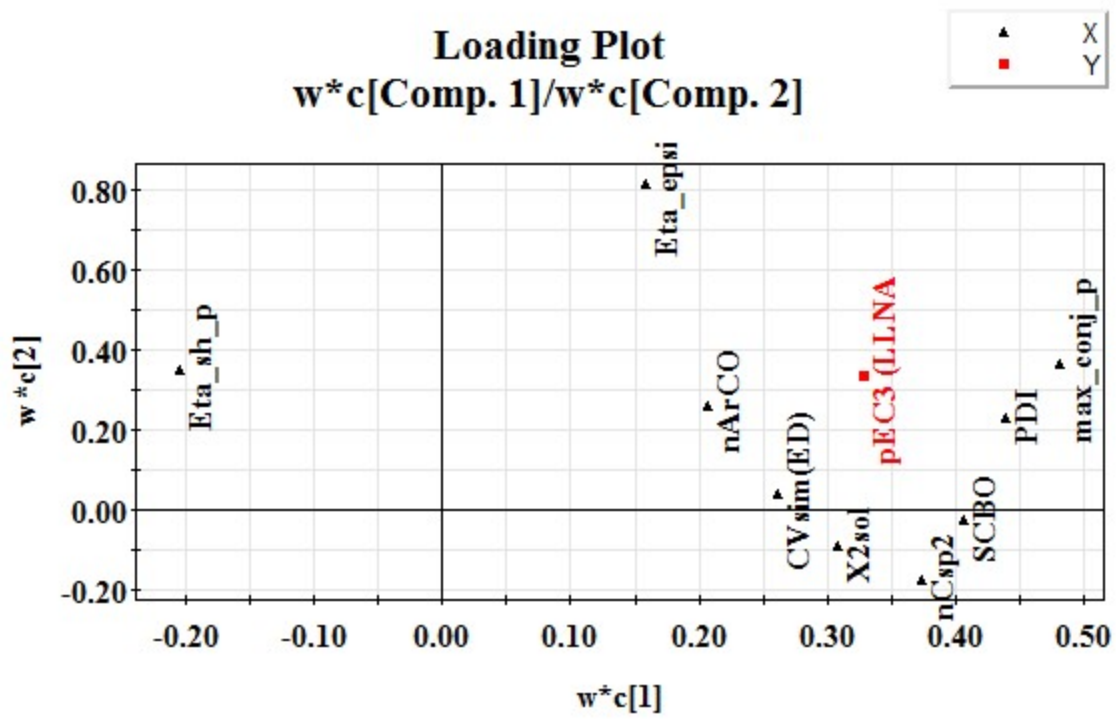

Figure S3. Loading Plot

Score Plot  
t[Comp. 1]/t[Comp. 2]

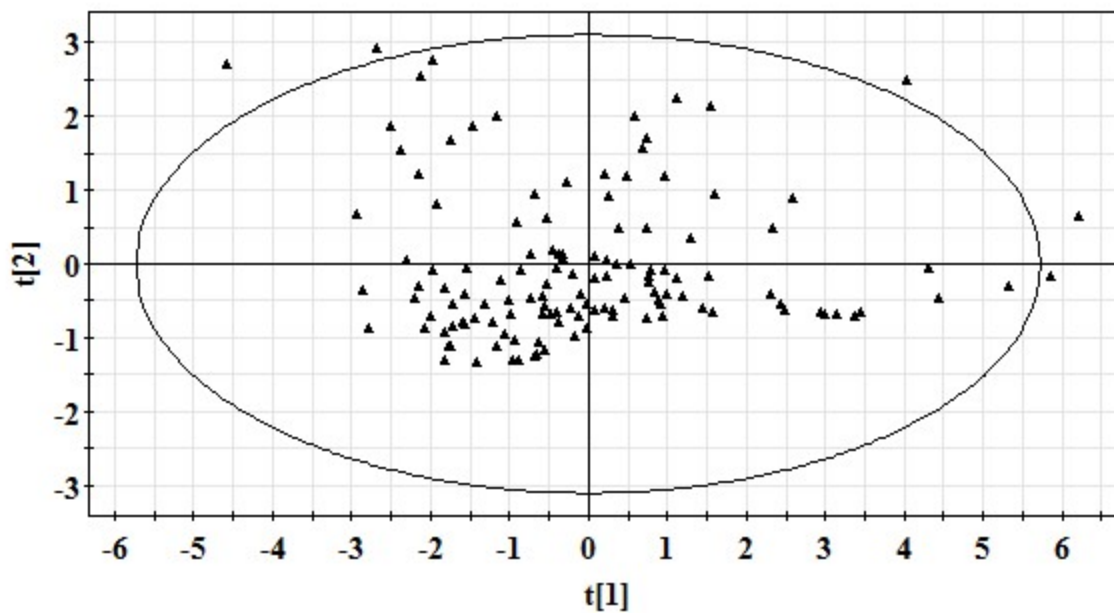

Figure S4. Score Plot

### Variable Importance Plot VIP[Comp. 8]

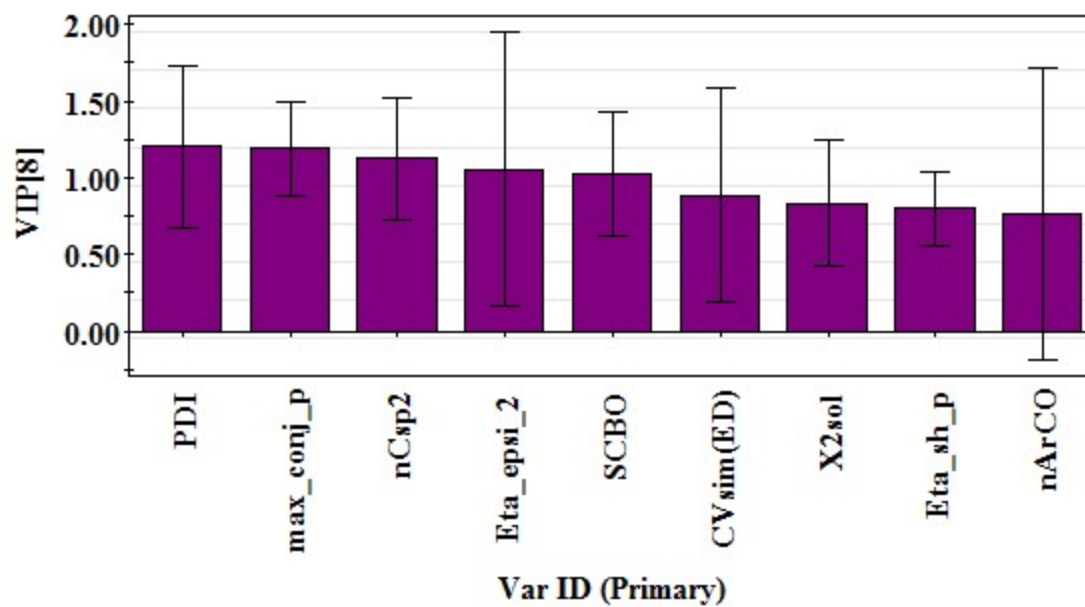

Figure S5. Variable Importance Plot

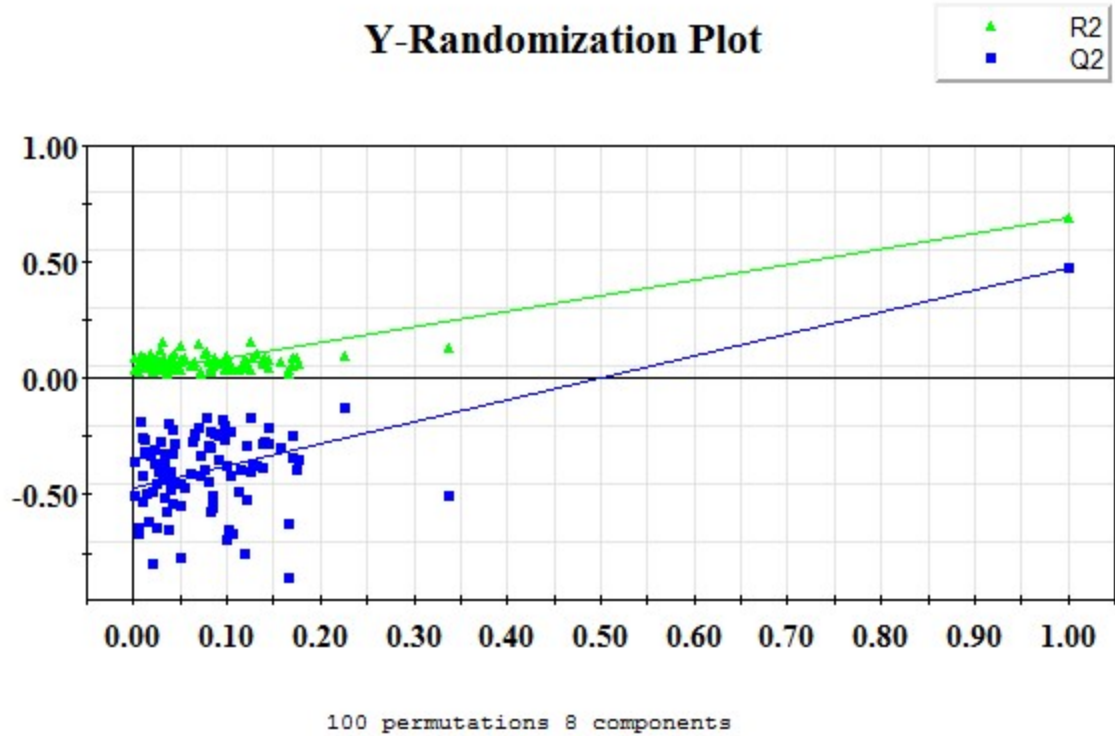

**Figure S6.** Y-Randomization Plot
